# Supplementary figures and images for: Xenorhabdus bovienii Strain Diversity Impacts Coevolution and Symbiotic Maintenance with Steinernema spp. Nematode Hosts
Source: PubMed Central journal article supplement — mBio. 2015 Jun 4;6(3):e00076-15. doi: 10.1128/mBio.00076-15 (PMC4462624; doi:10.1128/mbio.00076-15), 2015-06-04

**a**

— 0.01

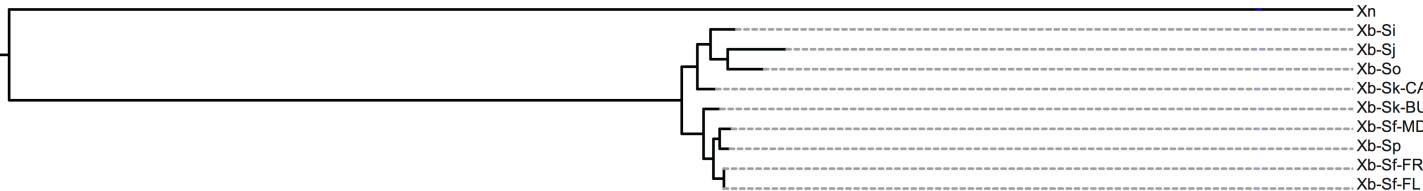**b**

— 0.01

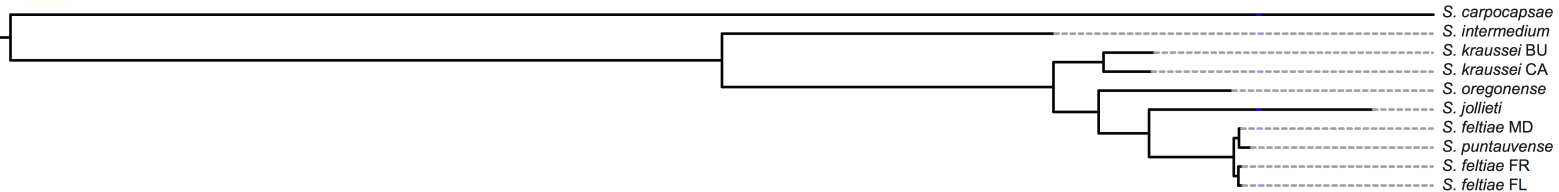

Supplement: mbo002152298sf1.pdf [file mbo002152298sf1.pdf]

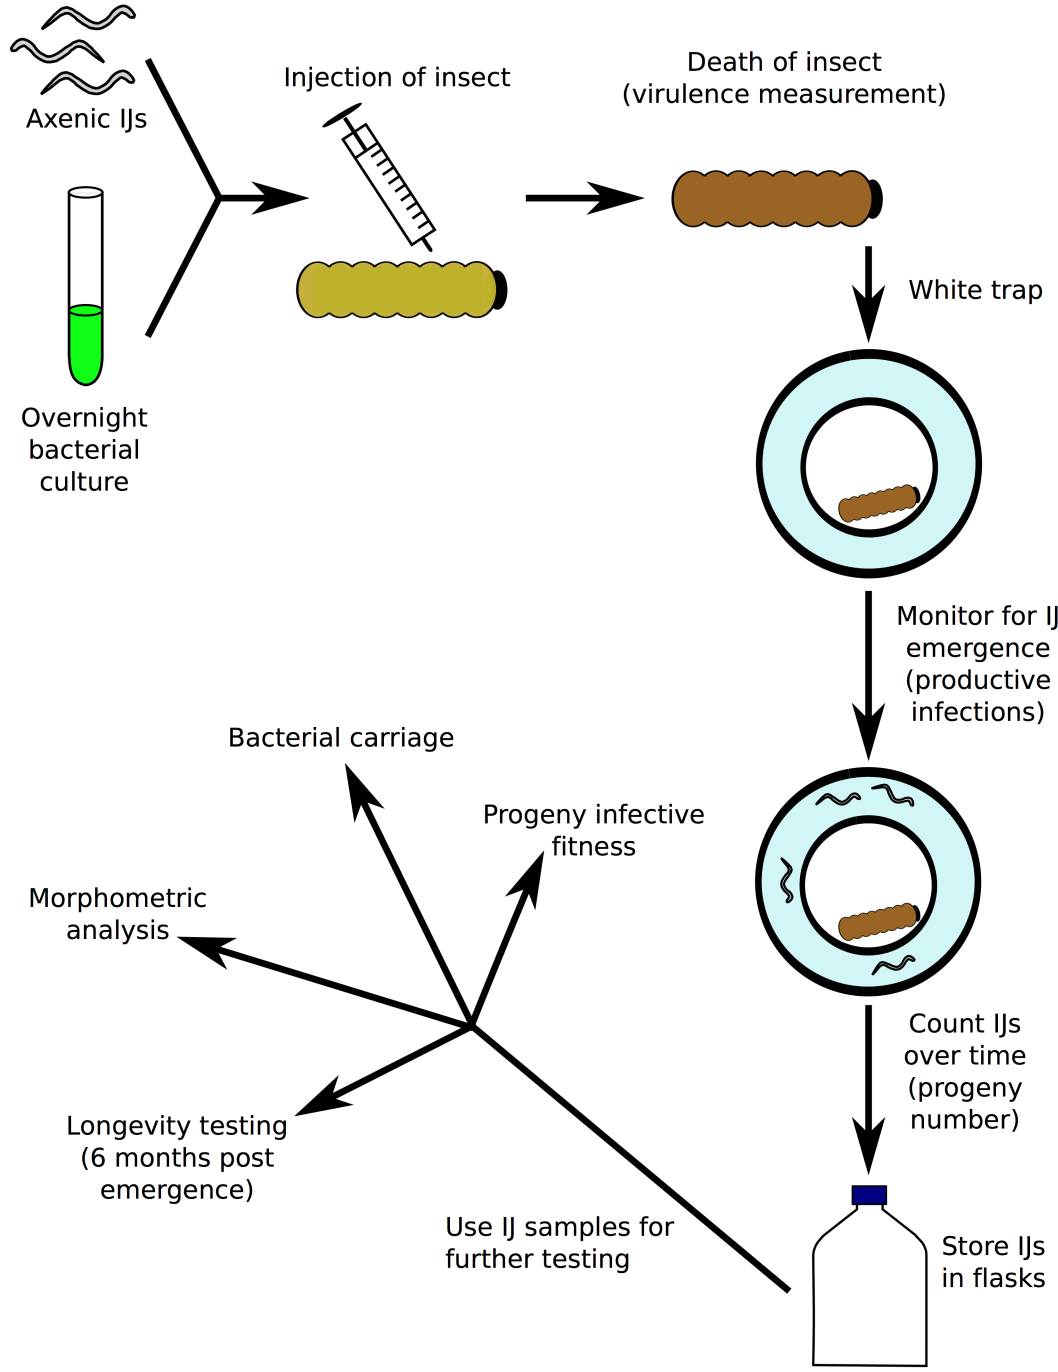

Supplement: mbo002152298sf2.pdf [file mbo002152298sf2.pdf]

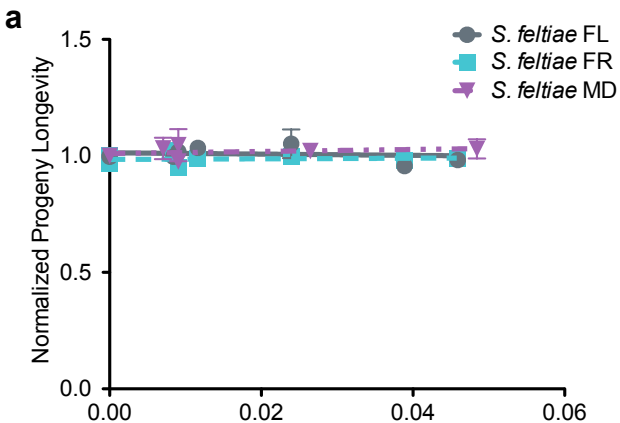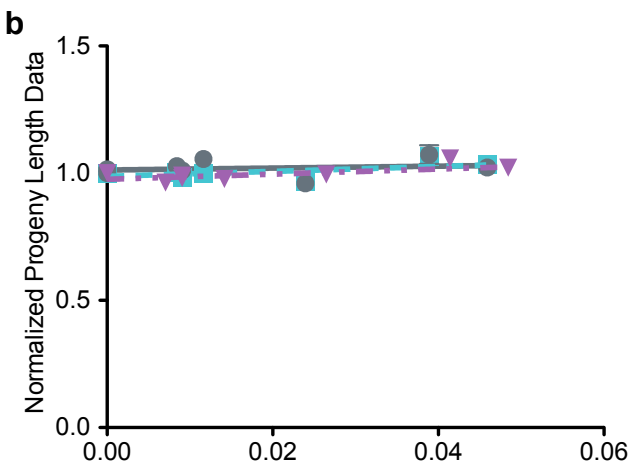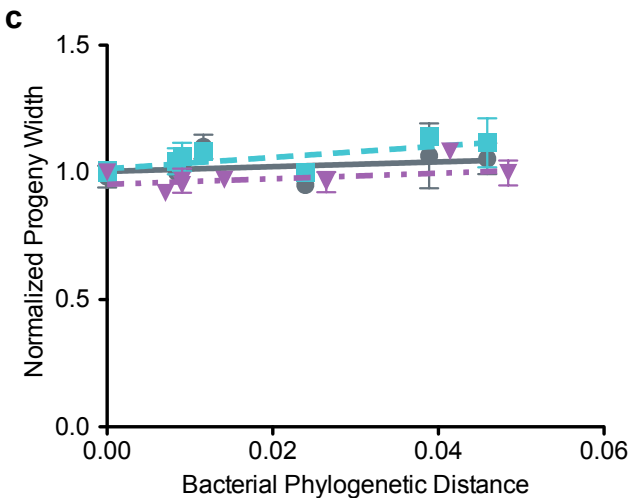

Supplement: mbo002152298sf3.pdf [file mbo002152298sf3.pdf]
